# Supplementary material for: Novel insight into the aetiology of rheumatoid arthritis gained by a cross-tissue transcriptome-wide association study
Source: PubMed Central journal article supplement (PMC9462377; doi:10.1136/rmdopen-2022-002529), 2022-09-08
Supplement: rmdopen-2022-002529supp001.pdf [file rmdopen-2022-002529supp001.pdf]

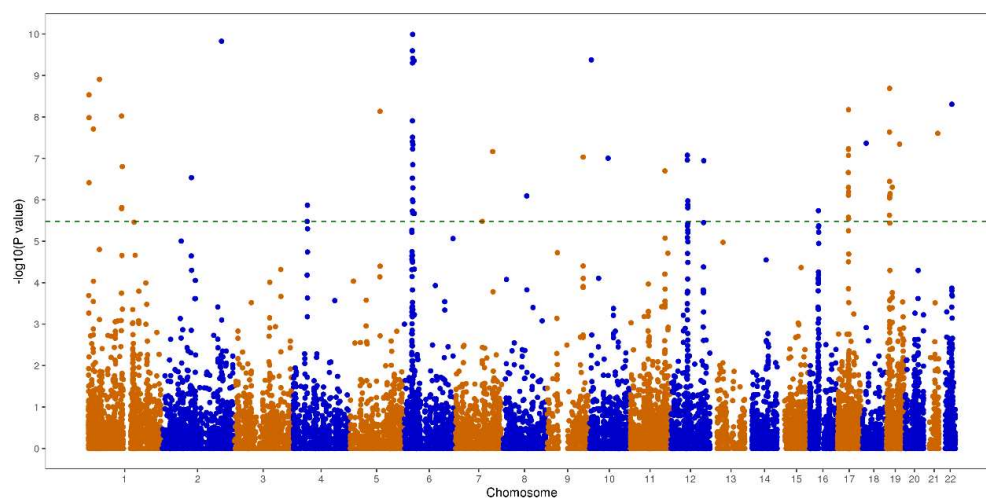

**Supplementary Figure 1.** Manhattan plot of the cross-tissue transcriptome-wide association results for RA. Ninety-six genes was specifically associated with the risk of RA. The y-axis represents  $P$ -value in  $-\log_{10}$  scale. A significance threshold of  $P = 2.89 \times 10^{-6}$  after Bonferroni-correction was used.

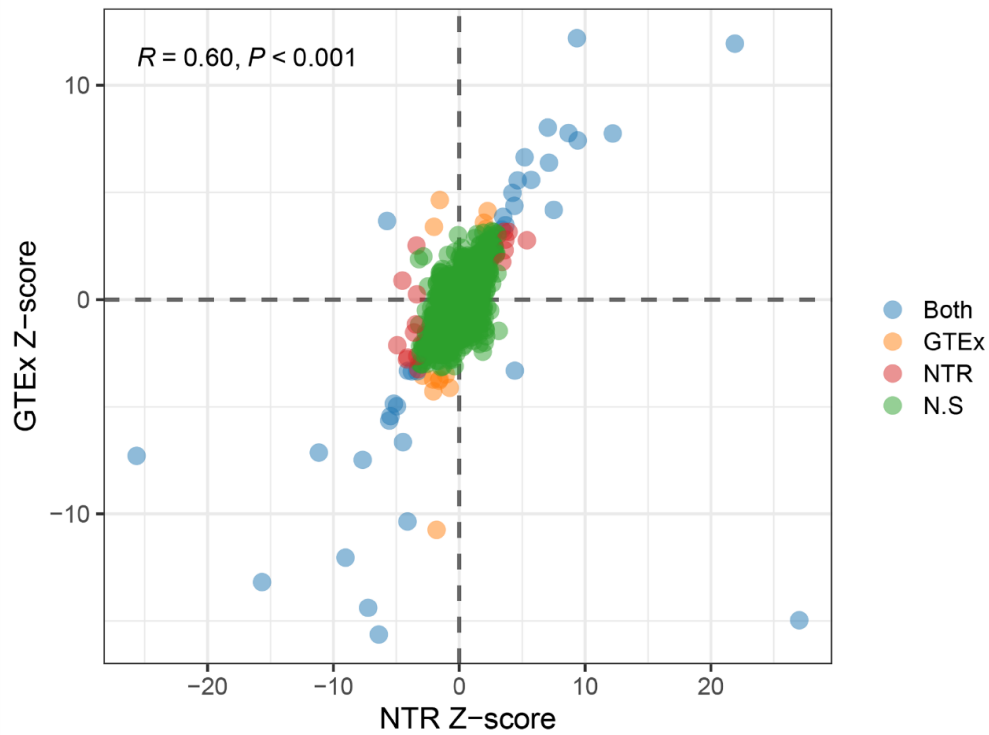

**Supplementary Figure 2.** Correlation plot shows the correlation of the effect sizes of TWAS between GTEEx and NTR.

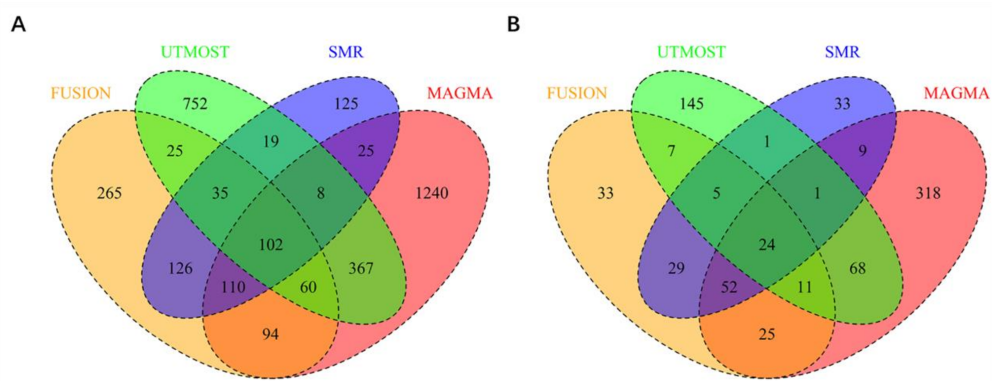

**Supplementary Figure 3.** Venn plot reveals the overlap of the significant genes identified by four different methods with  $P < 0.05$  (A) and  $FDR < 0.05$  (B).

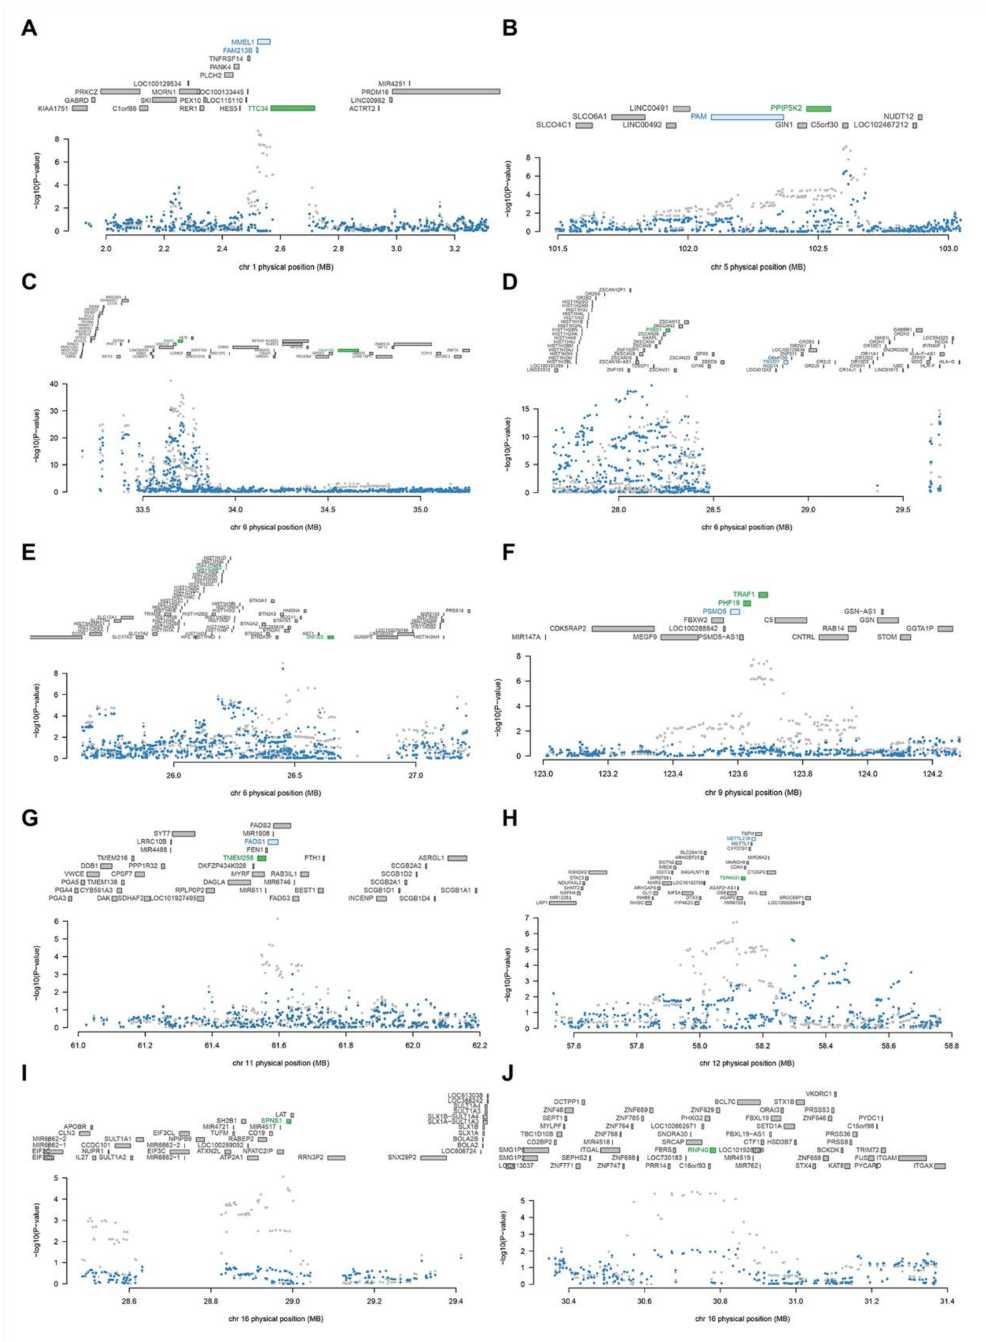

**Supplementary Figure 4.** Regional association of transcriptome-wide significant genes. **A:** Chromosome 1p36.32 regional association plot. **B:** Chromosome 5q21.1 regional association plot. **C:** Chromosome 6p21.31 regional association plot. **D:** Chromosome 6p22.1 regional association plot. **E:** Chromosome 6p22.2 regional association plot. **F:** Chromosome 9q33.2 regional association plot. **G:** Chromosome 11q12.2 regional association plot. **H:** Chromosome 12q14.1 regional association plot. **I:** Chromosome 16p11.2 regional association plot. **J:** Chromosome 16p11.2 regional association plot.
