# Supplementary material for: Novel insight into the aetiology of rheumatoid arthritis gained by a cross-tissue transcriptome-wide association study
Source: PubMed Central journal article supplement (PMC9462377; doi:10.1136/rmdopen-2022-002529), 2022-09-08
Supplement: rmdopen-2022-002529supp002.pdf [file rmdopen-2022-002529supp002.pdf]

**Supplementary Table 1. Sample sizes of 44 GTEx v6p tissues used in UTMOST**

| <b>Tissue</b>                             | <b>Sample size</b> |
|-------------------------------------------|--------------------|
| Adipose - Subcutaneous                    | 298                |
| Adipose - Visceral Omentum                | 185                |
| Adrenal Gland                             | 126                |
| Artery - Aorta                            | 197                |
| Artery - Coronary                         | 118                |
| Artery - Tibial                           | 285                |
| Brain - Anterior cingulate cortex (BA24)  | 72                 |
| Brain - Caudate (basal ganglia)           | 100                |
| Brain - Cerebellar Hemisphere             | 89                 |
| Brain - Cerebellum                        | 103                |
| Brain - Cortex                            | 96                 |
| Brain - Frontal Cortex (BA9)              | 92                 |
| Brain - Hippocampus                       | 81                 |
| Brain - Hypothalamus                      | 81                 |
| Brain - Nucleus accumbens (basal ganglia) | 93                 |
| Brain - Putamen (basal ganglia)           | 82                 |
| Breast - Mammary Tissue                   | 183                |
| Cells - EBV-transformed lymphocytes       | 114                |
| Cells - Transformed fibroblasts           | 272                |
| Colon - Sigmoid                           | 124                |
| Colon - Transverse                        | 169                |
| Esophagus - Gastroesophageal Junction     | 127                |
| Esophagus - Mucosa                        | 241                |
| Esophagus - Muscularis                    | 218                |
| Heart - Atrial Appendage                  | 159                |
| Heart - Left Ventricle                    | 190                |
| Liver                                     | 97                 |
| Lung                                      | 278                |
| Muscle - Skeletal                         | 361                |
| Nerve - Tibial                            | 256                |
| Ovary                                     | 85                 |
| Pancreas                                  | 149                |
| Pituitary                                 | 87                 |
| Prostate                                  | 87                 |
| Skin - Not Sun Exposed (Suprapubic)       | 196                |
| Skin - Sun Exposed (Lower leg)            | 302                |
| Small Intestine - Terminal Ileum          | 77                 |
| Spleen                                    | 89                 |
| Stomach                                   | 170                |
| Testis                                    | 157                |
| Thyroid                                   | 278                |
| Uterus                                    | 70                 |

---

|             |     |
|-------------|-----|
| Vagina      | 79  |
| Whole Blood | 338 |

---

**Supplementary Table 2. TWAS summary statistics in cross-tissue test using 44 GTEx tissues ( $P_{FDR}<0.05$ )**

| <b>Gene</b>      | <b>Test_score</b> | <b>P_value</b> | <b><math>P_{FDR}</math></b> |
|------------------|-------------------|----------------|-----------------------------|
| <i>TRIM27</i>    | 29.80             | 1.52E-13       | 4.60E-10                    |
| <i>IRF5</i>      | 27.00             | 6.43E-13       | 1.22E-09                    |
| <i>TRIM10</i>    | 91.97             | 7.28E-12       | 6.12E-09                    |
| <i>BCL2L15</i>   | 168.60            | 1.09E-11       | 7.87E-09                    |
| <i>PUS10</i>     | 280.13            | 2.55E-11       | 1.38E-08                    |
| <i>TNPO3</i>     | 196.26            | 2.55E-11       | 1.38E-08                    |
| <i>INPP5B</i>    | 19.11             | 1.24E-09       | 5.06E-07                    |
| <i>FAM213B</i>   | 18.82             | 2.93E-09       | 1.14E-06                    |
| <i>GSDMB</i>     | 17.46             | 6.70E-09       | 2.47E-06                    |
| <i>PAM</i>       | 18.02             | 7.33E-09       | 2.64E-06                    |
| <i>MMEL1</i>     | 17.32             | 1.04E-08       | 3.57E-06                    |
| <i>UBASH3A</i>   | 15.83             | 2.49E-08       | 7.87E-06                    |
| <i>ORMDL3</i>    | 15.87             | 5.87E-08       | 1.64E-05                    |
| <i>RPS26</i>     | 14.86             | 8.40E-08       | 2.18E-05                    |
| <i>SUOX</i>      | 14.02             | 1.10E-07       | 2.70E-05                    |
| <i>AFF3</i>      | 14.15             | 2.92E-07       | 6.51E-05                    |
| <i>TSSK6</i>     | 14.53             | 4.95E-07       | 1.04E-04                    |
| <i>PGAP3</i>     | 12.91             | 7.72E-07       | 1.52E-04                    |
| <i>TYK2</i>      | 12.87             | 8.01E-07       | 1.55E-04                    |
| <i>C6orf106</i>  | 11.98             | 2.14E-06       | 3.49E-04                    |
| <i>FCRL3</i>     | 11.72             | 3.47E-06       | 5.31E-04                    |
| <i>ALDH2</i>     | 11.81             | 3.54E-06       | 5.36E-04                    |
| <i>OCIAD1</i>    | 11.28             | 5.00E-06       | 7.14E-04                    |
| <i>RNF40</i>     | 10.68             | 6.05E-06       | 8.28E-04                    |
| <i>RNASET2</i>   | 10.83             | 8.61E-06       | 1.13E-03                    |
| <i>METTL21B</i>  | 10.02             | 1.03E-05       | 1.34E-03                    |
| <i>COG6</i>      | 10.85             | 1.06E-05       | 1.35E-03                    |
| <i>HMGNA4</i>    | 10.18             | 1.79E-05       | 2.25E-03                    |
| <i>HIST1H2BD</i> | 10.64             | 2.26E-05       | 2.61E-03                    |
| <i>TRAF1</i>     | 9.86              | 3.95E-05       | 4.34E-03                    |
| <i>PIIP5K2</i>   | 9.46              | 3.99E-05       | 4.34E-03                    |
| <i>PEAK1</i>     | 9.42              | 4.31E-05       | 4.63E-03                    |
| <i>ZNF322</i>    | 8.16              | 7.11E-05       | 7.08E-03                    |
| <i>ZNF438</i>    | 8.85              | 7.83E-05       | 7.65E-03                    |
| <i>FAM167A</i>   | 9.60              | 8.38E-05       | 8.03E-03                    |
| <i>DAP</i>       | 8.48              | 9.19E-05       | 8.65E-03                    |
| <i>C5</i>        | 8.66              | 1.23E-04       | 1.11E-02                    |
| <i>PSMD5</i>     | 8.36              | 1.30E-04       | 1.16E-02                    |
| <i>SPNS1</i>     | 8.27              | 1.57E-04       | 1.34E-02                    |
| <i>GMIP</i>      | 8.40              | 1.74E-04       | 1.43E-02                    |
| <i>FAM109A</i>   | 7.96              | 1.75E-04       | 1.43E-02                    |

|                  |        |           |           |
|------------------|--------|-----------|-----------|
| <i>PSD4</i>      | 6.76   | 2.42E-04  | 1.87E-02  |
| <i>SLPI</i>      | 8.20   | 2.41E-04  | 1.87E-02  |
| <i>PDHB</i>      | 6.86   | 3.03E-04  | 2.22E-02  |
| <i>TMEM50B</i>   | 6.42   | 3.06E-04  | 2.23E-02  |
| <i>SULT1A2</i>   | 6.82   | 3.89E-04  | 2.72E-02  |
| <i>TMEM258</i>   | 6.92   | 4.94E-04  | 3.24E-02  |
| <i>MYH7B</i>     | 5.90   | 5.44E-04  | 3.46E-02  |
| <i>OPRL1</i>     | 6.77   | 5.97E-04  | 3.75E-02  |
| <i>UHRF1BP1</i>  | 6.07   | 5.95E-04  | 3.75E-02  |
| <i>FBXO40</i>    | 7.54   | 7.05E-04  | 4.27E-02  |
| <i>NFX1</i>      | 6.43   | 7.26E-04  | 4.36E-02  |
| <i>FHL3</i>      | 6.40   | 7.76E-04  | 4.61E-02  |
| <i>C6orf10</i>   | 33.90  | 5.66E-252 | 8.57E-248 |
| <i>MUC22</i>     | 8.86   | 7.82E-19  | 5.92E-15  |
| <i>OR2W1</i>     | 8.61   | 7.22E-18  | 3.65E-14  |
| <i>HIST1H2BN</i> | 30.55  | 7.11E-14  | 2.69E-10  |
| <i>CAPZA1</i>    | 29.23  | 2.14E-13  | 5.39E-10  |
| <i>LEMD2</i>     | 27.64  | 3.36E-13  | 7.28E-10  |
| <i>CDSN</i>      | 25.52  | 1.32E-12  | 2.22E-09  |
| <i>C6orf15</i>   | 103.35 | 3.64E-12  | 4.24E-09  |
| <i>GGNBP1</i>    | 68.72  | 3.64E-12  | 4.24E-09  |
| <i>TRIM15</i>    | 68.27  | 3.64E-12  | 4.24E-09  |
| <i>TRIM40</i>    | 69.31  | 3.63E-12  | 4.24E-09  |
| <i>CD28</i>      | 26.55  | 4.06E-12  | 4.39E-09  |
| <i>SYT6</i>      | 102.40 | 5.46E-12  | 5.17E-09  |
| <i>TRIM31</i>    | 138.63 | 5.45E-12  | 5.17E-09  |
| <i>ZSCAN12</i>   | 181.05 | 7.23E-12  | 6.12E-09  |
| <i>MAS1L</i>     | 136.31 | 9.10E-12  | 6.89E-09  |
| <i>TREH</i>      | 170.28 | 9.08E-12  | 6.89E-09  |
| <i>DCLRE1B</i>   | 485.91 | 1.45E-11  | 9.97E-09  |
| <i>ANKRD55</i>   | 125.90 | 1.89E-11  | 1.19E-08  |
| <i>PTPN22</i>    | 512.74 | 1.82E-11  | 1.19E-08  |
| <i>HIPK1</i>     | 377.97 | 2.36E-11  | 1.38E-08  |
| <i>PHTF1</i>     | 762.46 | 2.36E-11  | 1.38E-08  |
| <i>RASGRP1</i>   | 22.74  | 5.42E-11  | 2.83E-08  |
| <i>SCAND3</i>    | 22.92  | 1.02E-10  | 5.15E-08  |
| <i>WDR12</i>     | 22.32  | 1.49E-10  | 7.27E-08  |
| <i>HIST1H2BO</i> | 22.02  | 2.53E-10  | 1.20E-07  |
| <i>C6orf100</i>  | 68.91  | 3.84E-10  | 1.76E-07  |
| <i>RBM17</i>     | 20.42  | 4.21E-10  | 1.87E-07  |
| <i>IP6K3</i>     | 21.24  | 4.42E-10  | 1.91E-07  |
| <i>ZSCAN9</i>    | 20.10  | 4.97E-10  | 2.09E-07  |
| <i>ZGLP1</i>     | 18.47  | 2.05E-09  | 8.16E-07  |
| <i>NPTXR</i>     | 18.46  | 4.94E-09  | 1.87E-06  |

|                  |        |          |          |
|------------------|--------|----------|----------|
| <i>AP4B1</i>     | 212.99 | 9.51E-09 | 3.35E-06 |
| <i>OR2B6</i>     | 18.01  | 1.24E-08 | 4.18E-06 |
| <i>PADI4</i>     | 16.59  | 1.96E-08 | 6.46E-06 |
| <i>COL5A3</i>    | 16.54  | 2.32E-08 | 7.49E-06 |
| <i>NKAPL</i>     | 17.03  | 3.09E-08 | 9.54E-06 |
| <i>HIST1H2AJ</i> | 16.47  | 3.96E-08 | 1.20E-05 |
| <i>PTPN2</i>     | 16.65  | 4.31E-08 | 1.28E-05 |
| <i>ZNF226</i>    | 16.95  | 4.54E-08 | 1.32E-05 |
| <i>OR11A1</i>    | -5.46  | 4.66E-08 | 1.33E-05 |
| <i>GPX6</i>      | -5.42  | 5.95E-08 | 1.64E-05 |
| <i>MIEN1</i>     | 15.92  | 6.09E-08 | 1.65E-05 |
| <i>LEP</i>       | 15.82  | 6.85E-08 | 1.82E-05 |
| <i>ZBP2</i>      | 16.31  | 8.51E-08 | 2.18E-05 |
| <i>PHF19</i>     | 15.46  | 9.31E-08 | 2.35E-05 |
| <i>ARID5B</i>    | 16.28  | 9.91E-08 | 2.46E-05 |
| <i>HECTD4</i>    | 14.79  | 1.14E-07 | 2.75E-05 |
| <i>OR2B3</i>     | -5.26  | 1.42E-07 | 3.36E-05 |
| <i>ATP1A1</i>    | 15.96  | 1.58E-07 | 3.67E-05 |
| <i>DDX6</i>      | 14.51  | 2.01E-07 | 4.62E-05 |
| <i>FBXL20</i>    | 14.78  | 2.20E-07 | 4.98E-05 |
| <i>HIST1H2AL</i> | 14.92  | 3.01E-07 | 6.60E-05 |
| <i>RAVER1</i>    | 14.45  | 3.59E-07 | 7.77E-05 |
| <i>TTC34</i>     | 13.50  | 3.86E-07 | 8.22E-05 |
| <i>STARD3</i>    | 14.33  | 5.00E-07 | 1.04E-04 |
| <i>UBD</i>       | 34.67  | 5.14E-07 | 1.05E-04 |
| <i>RAPGEFL1</i>  | 13.70  | 6.42E-07 | 1.30E-04 |
| <i>ZNF433</i>    | 12.17  | 7.11E-07 | 1.42E-04 |
| <i>TPD52</i>     | 13.25  | 8.07E-07 | 1.55E-04 |
| <i>PDE4A</i>     | 13.48  | 9.04E-07 | 1.71E-04 |
| <i>ZSCAN23</i>   | 12.19  | 1.01E-06 | 1.89E-04 |
| <i>OS9</i>       | 11.84  | 1.06E-06 | 1.95E-04 |
| <i>OR2H1</i>     | -4.87  | 1.10E-06 | 2.01E-04 |
| <i>CYP27B1</i>   | 12.74  | 1.33E-06 | 2.37E-04 |
| <i>PIP4K2C</i>   | 12.79  | 1.33E-06 | 2.37E-04 |
| <i>SLC10A4</i>   | 13.25  | 1.35E-06 | 2.37E-04 |
| <i>BCAS2</i>     | 13.31  | 1.54E-06 | 2.68E-04 |
| <i>GLI1</i>      | 13.71  | 1.56E-06 | 2.68E-04 |
| <i>OLFML3</i>    | 12.34  | 1.63E-06 | 2.78E-04 |
| <i>C16orf54</i>  | 12.93  | 1.83E-06 | 3.08E-04 |
| <i>HIST1H4J</i>  | 128.90 | 1.87E-06 | 3.11E-04 |
| <i>OR5V1</i>     | 4.74   | 2.10E-06 | 3.46E-04 |
| <i>OLFM2</i>     | 12.20  | 2.36E-06 | 3.81E-04 |
| <i>ERBB2</i>     | 12.74  | 2.64E-06 | 4.21E-04 |
| <i>TOP2A</i>     | 12.67  | 2.85E-06 | 4.49E-04 |

|                  |       |          |          |
|------------------|-------|----------|----------|
| <i>COMMD8</i>    | 12.42 | 3.33E-06 | 5.15E-04 |
| <i>KRIT1</i>     | 12.23 | 3.32E-06 | 5.15E-04 |
| <i>KANK2</i>     | 11.93 | 3.64E-06 | 5.45E-04 |
| <i>TSPAN31</i>   | 11.28 | 3.70E-06 | 5.50E-04 |
| <i>BCL7C</i>     | 12.23 | 4.24E-06 | 6.22E-04 |
| <i>SLC39A5</i>   | 12.46 | 4.27E-06 | 6.22E-04 |
| <i>SEZ6L2</i>    | 12.06 | 4.49E-06 | 6.47E-04 |
| <i>METTL1</i>    | 11.48 | 5.45E-06 | 7.64E-04 |
| <i>SLC17A2</i>   | 12.11 | 5.42E-06 | 7.64E-04 |
| <i>IKZF3</i>     | 12.61 | 5.59E-06 | 7.76E-04 |
| <i>HFE</i>       | 11.12 | 6.11E-06 | 8.28E-04 |
| <i>TSFM</i>      | 10.94 | 6.13E-06 | 8.28E-04 |
| <i>COQ10A</i>    | 11.53 | 8.18E-06 | 1.10E-03 |
| <i>MFRP</i>      | -4.45 | 8.40E-06 | 1.12E-03 |
| <i>SLC1A4</i>    | 11.50 | 9.90E-06 | 1.29E-03 |
| <i>C16orf93</i>  | 10.70 | 1.13E-05 | 1.44E-03 |
| <i>MANEAL</i>    | 10.88 | 1.58E-05 | 2.00E-03 |
| <i>OCIAD2</i>    | 10.75 | 1.82E-05 | 2.26E-03 |
| <i>FAM214B</i>   | 10.28 | 1.89E-05 | 2.33E-03 |
| <i>KCNJ5</i>     | 10.73 | 1.94E-05 | 2.37E-03 |
| <i>PTGES3</i>    | 10.33 | 1.97E-05 | 2.38E-03 |
| <i>KRT26</i>     | 10.58 | 2.03E-05 | 2.44E-03 |
| <i>ADAMTS4</i>   | 10.66 | 2.18E-05 | 2.60E-03 |
| <i>HIST1H2AI</i> | 10.58 | 2.20E-05 | 2.60E-03 |
| <i>SYCP1</i>     | 10.61 | 2.21E-05 | 2.60E-03 |
| <i>LYG2</i>      | 25.46 | 2.26E-05 | 2.61E-03 |
| <i>HIST1H2BE</i> | 10.53 | 2.75E-05 | 3.16E-03 |
| <i>RDH11</i>     | 10.67 | 2.82E-05 | 3.21E-03 |
| <i>ZNF184</i>    | 9.88  | 2.87E-05 | 3.24E-03 |
| <i>TCAP</i>      | 9.94  | 3.13E-05 | 3.52E-03 |
| <i>PGBD1</i>     | 9.85  | 3.19E-05 | 3.55E-03 |
| <i>AGAP2-AS1</i> | 9.76  | 3.24E-05 | 3.59E-03 |
| <i>SH2B3</i>     | 9.78  | 4.17E-05 | 4.51E-03 |
| <i>SPDEF</i>     | 9.68  | 4.72E-05 | 5.03E-03 |
| <i>HIST1H1C</i>  | 9.79  | 4.83E-05 | 5.08E-03 |
| <i>IL12A</i>     | 9.73  | 4.80E-05 | 5.08E-03 |
| <i>C19orf80</i>  | 9.97  | 5.06E-05 | 5.21E-03 |
| <i>LONRF2</i>    | 10.07 | 5.03E-05 | 5.21E-03 |
| <i>ZSWIM3</i>    | 9.13  | 5.06E-05 | 5.21E-03 |
| <i>KCTD13</i>    | 9.43  | 5.52E-05 | 5.65E-03 |
| <i>ARCNI</i>     | 9.16  | 6.22E-05 | 6.32E-03 |
| <i>TBC1D10B</i>  | 10.24 | 6.46E-05 | 6.52E-03 |
| <i>ATP10D</i>    | 8.96  | 6.57E-05 | 6.59E-03 |
| <i>SLCO4C1</i>   | 9.32  | 7.22E-05 | 7.14E-03 |

|                 |       |          |          |
|-----------------|-------|----------|----------|
| <i>LAT</i>      | 8.59  | 7.78E-05 | 7.65E-03 |
| <i>RAB14</i>    | 8.71  | 7.88E-05 | 7.65E-03 |
| <i>LRP1</i>     | 9.21  | 8.15E-05 | 7.86E-03 |
| <i>IL1F10</i>   | 9.08  | 8.82E-05 | 8.35E-03 |
| <i>INO80E</i>   | 7.83  | 8.80E-05 | 8.35E-03 |
| <i>RCC2</i>     | 9.00  | 9.25E-05 | 8.65E-03 |
| <i>BOLA2B</i>   | 7.33  | 9.62E-05 | 8.94E-03 |
| <i>CD86</i>     | 9.22  | 9.77E-05 | 9.03E-03 |
| <i>LHX9</i>     | 9.05  | 1.01E-04 | 9.31E-03 |
| <i>NP1PB11</i>  | 7.75  | 1.04E-04 | 9.50E-03 |
| <i>FADS1</i>    | 8.34  | 1.08E-04 | 9.77E-03 |
| <i>ATG5</i>     | 8.84  | 1.17E-04 | 1.06E-02 |
| <i>GTPBP1</i>   | 8.87  | 1.35E-04 | 1.20E-02 |
| <i>PNMT</i>     | 9.05  | 1.40E-04 | 1.23E-02 |
| <i>RNF26</i>    | 8.19  | 1.43E-04 | 1.25E-02 |
| <i>PPP1CC</i>   | 8.71  | 1.49E-04 | 1.29E-02 |
| <i>ZBTB10</i>   | 8.93  | 1.49E-04 | 1.29E-02 |
| <i>ZNF165</i>   | 8.41  | 1.50E-04 | 1.29E-02 |
| <i>APOBEC3F</i> | 8.43  | 1.55E-04 | 1.33E-02 |
| <i>NAA25</i>    | 7.97  | 1.59E-04 | 1.34E-02 |
| <i>DARS2</i>    | 7.85  | 1.61E-04 | 1.35E-02 |
| <i>RDH16</i>    | 7.96  | 1.61E-04 | 1.35E-02 |
| <i>AHCYL2</i>   | 8.46  | 1.66E-04 | 1.38E-02 |
| <i>HSD17B6</i>  | 8.41  | 1.72E-04 | 1.42E-02 |
| <i>MAG13</i>    | 8.31  | 1.79E-04 | 1.45E-02 |
| <i>MMP19</i>    | 8.38  | 1.78E-04 | 1.45E-02 |
| <i>CBX6</i>     | 8.22  | 1.97E-04 | 1.59E-02 |
| <i>MIB2</i>     | 7.75  | 2.04E-04 | 1.63E-02 |
| <i>ADSL</i>     | 7.76  | 2.10E-04 | 1.67E-02 |
| <i>TRIM59</i>   | 8.43  | 2.14E-04 | 1.70E-02 |
| <i>NDUFA13</i>  | 8.05  | 2.26E-04 | 1.78E-02 |
| <i>FRYL</i>     | 8.14  | 2.33E-04 | 1.83E-02 |
| <i>BCL2L11</i>  | 8.14  | 2.42E-04 | 1.87E-02 |
| <i>RGL3</i>     | 7.52  | 2.58E-04 | 1.99E-02 |
| <i>PPAP2A</i>   | 7.35  | 2.64E-04 | 2.02E-02 |
| <i>KEAP1</i>    | 7.74  | 2.69E-04 | 2.05E-02 |
| <i>IL15</i>     | 7.61  | 2.70E-04 | 2.05E-02 |
| <i>RPS25</i>    | 7.33  | 2.77E-04 | 2.09E-02 |
| <i>ATP13A2</i>  | 7.94  | 2.84E-04 | 2.13E-02 |
| <i>HEBP2</i>    | 7.96  | 2.87E-04 | 2.14E-02 |
| <i>KIR2DL1</i>  | 3.62  | 2.91E-04 | 2.16E-02 |
| <i>ZSCAN31</i>  | 80.53 | 2.99E-04 | 2.21E-02 |
| <i>KRT20</i>    | 7.80  | 3.02E-04 | 2.22E-02 |
| <i>CDK2</i>     | 7.95  | 3.21E-04 | 2.32E-02 |

|                  |       |          |          |
|------------------|-------|----------|----------|
| <i>Clorf106</i>  | 7.75  | 3.32E-04 | 2.39E-02 |
| <i>CCDC84</i>    | 7.31  | 3.32E-04 | 2.39E-02 |
| <i>HIST1H4K</i>  | 7.49  | 3.76E-04 | 2.68E-02 |
| <i>ELMOD1</i>    | 7.29  | 3.81E-04 | 2.71E-02 |
| <i>DMC1</i>      | 7.61  | 3.90E-04 | 2.72E-02 |
| <i>MSTN</i>      | 8.04  | 3.86E-04 | 2.72E-02 |
| <i>PHLDB1</i>    | 7.33  | 3.89E-04 | 2.72E-02 |
| <i>GRHL2</i>     | 8.19  | 3.98E-04 | 2.76E-02 |
| <i>HIST1H2BG</i> | 8.06  | 4.00E-04 | 2.76E-02 |
| <i>ZNF560</i>    | 7.06  | 4.01E-04 | 2.76E-02 |
| <i>MEF2B</i>     | 7.82  | 4.03E-04 | 2.76E-02 |
| <i>TSPAN14</i>   | 7.06  | 4.19E-04 | 2.86E-02 |
| <i>ECSIT</i>     | 7.44  | 4.32E-04 | 2.93E-02 |
| <i>IGSF3</i>     | 7.82  | 4.36E-04 | 2.95E-02 |
| <i>BOLA2</i>     | 6.05  | 4.39E-04 | 2.95E-02 |
| <i>LCE4A</i>     | 6.21  | 4.45E-04 | 2.98E-02 |
| <i>OR14J1</i>    | -3.51 | 4.48E-04 | 2.98E-02 |
| <i>ZKSCAN3</i>   | 6.51  | 4.49E-04 | 2.98E-02 |
| <i>CCDC28A</i>   | 7.33  | 4.57E-04 | 3.01E-02 |
| <i>CD63</i>      | 7.56  | 4.56E-04 | 3.01E-02 |
| <i>ACAD10</i>    | 7.55  | 5.09E-04 | 3.28E-02 |
| <i>FADS3</i>     | 7.32  | 5.07E-04 | 3.28E-02 |
| <i>HIST1H1T</i>  | 7.63  | 5.10E-04 | 3.28E-02 |
| <i>RIMBP3B</i>   | 3.48  | 5.06E-04 | 3.28E-02 |
| <i>HIST1H2BM</i> | 7.33  | 5.30E-04 | 3.40E-02 |
| <i>SLC35E2</i>   | 6.23  | 5.42E-04 | 3.46E-02 |
| <i>MKS1</i>      | 6.59  | 5.70E-04 | 3.61E-02 |
| <i>YAF2</i>      | 6.62  | 6.10E-04 | 3.82E-02 |
| <i>ANXA11</i>    | 6.82  | 6.15E-04 | 3.83E-02 |
| <i>HIST1H4F</i>  | 6.38  | 6.32E-04 | 3.92E-02 |
| <i>PRPF19</i>    | 6.77  | 6.44E-04 | 3.98E-02 |
| <i>PACSIN3</i>   | 7.09  | 6.56E-04 | 4.04E-02 |
| <i>HIST1H3I</i>  | 7.40  | 6.63E-04 | 4.04E-02 |
| <i>TEC</i>       | 6.59  | 6.61E-04 | 4.04E-02 |
| <i>ZSCAN5B</i>   | 7.07  | 6.65E-04 | 4.04E-02 |
| <i>ENTHD1</i>    | 7.17  | 7.16E-04 | 4.32E-02 |
| <i>FAM161A</i>   | 6.43  | 7.32E-04 | 4.38E-02 |
| <i>CTF1</i>      | 7.11  | 7.49E-04 | 4.46E-02 |
| <i>MIP</i>       | 7.19  | 7.85E-04 | 4.65E-02 |
| <i>ABI2</i>      | 6.74  | 7.95E-04 | 4.68E-02 |
| <i>PPM1J</i>     | 6.83  | 8.19E-04 | 4.81E-02 |
| <i>TNFSF4</i>    | 7.19  | 8.28E-04 | 4.84E-02 |
| <i>SLC30A7</i>   | 6.77  | 8.37E-04 | 4.85E-02 |
| <i>TG</i>        | 6.30  | 8.34E-04 | 4.85E-02 |



---

|              |      |          |          |
|--------------|------|----------|----------|
| <i>SIPR2</i> | 6.88 | 8.64E-04 | 4.99E-02 |
|--------------|------|----------|----------|

---

**Supplementary Table 3. TWAS summary statistics in single-tissue test using whole blood eQTL from GTEx**

| Gene         | CHR | BEST.<br>GWAS.ID | BEST.<br>GWAS.Z | EQTL.ID    | EQTL.Z | EQTL.<br>GWAS.Z | NSNP | TWAS.Z | TWAS.P    | FDR       |
|--------------|-----|------------------|-----------------|------------|--------|-----------------|------|--------|-----------|-----------|
| HLA-DRB1     | 6   | rs477515         | 33.82           | rs28366298 | -9.93  | 29.98           | 239  | -34.93 | 2.37E-267 | 1.91E-263 |
| HLA-DQA2     | 6   | rs477515         | 33.82           | rs28366298 | 17.58  | 30.34           | 260  | 28.85  | 4.91E-183 | 1.98E-179 |
| AGPAT1       | 6   | rs477515         | 33.82           | rs2071295  | -3.51  | 28.37           | 170  | -28.37 | 4.74E-177 | 1.28E-173 |
| PRRC2A       | 6   | rs17421624       | 28.90           | rs2075800  | 6.63   | 27.99           | 283  | 27.99  | 2.09E-172 | 4.22E-169 |
| PBX2         | 6   | rs477515         | 33.82           | rs3891175  | -3.94  | -17.09          | 170  | 26.33  | 7.96E-153 | 1.29E-149 |
| NELFE        | 6   | rs17421624       | 28.90           | rs6907185  | -4.99  | -15.84          | 222  | 20.31  | 9.53E-92  | 1.28E-88  |
| HLA-DPB2     | 6   | rs3819721        | 33.27           | rs2071025  | 9.36   | -12.19          | 338  | -18.44 | 5.82E-76  | 6.71E-73  |
| CYP21A1P     | 6   | rs17421624       | 28.90           | rs1150753  | -9.46  | -5.33           | 197  | 16.93  | 2.60E-64  | 2.62E-61  |
| PSORS1C3     | 6   | rs2844509        | -19.18          | rs1265096  | 8.70   | 18.57           | 174  | 16.39  | 2.30E-60  | 2.06E-57  |
| HLA-DRB6     | 6   | rs477515         | 33.82           | rs28366298 | 15.25  | 30.16           | 255  | 16.07  | 3.91E-58  | 3.16E-55  |
| TAP2         | 6   | rs477515         | 33.82           | rs4148876  | -9.36  | 12.08           | 272  | -15.63 | 4.71E-55  | 3.46E-52  |
| HLA-C        | 6   | rs707939         | 27.46           | rs1265087  | 10.07  | -5.36           | 205  | -15.61 | 6.27E-55  | 4.22E-52  |
| HSPA1B       | 6   | rs17421624       | 28.90           | rs521977   | 4.45   | -15.27          | 239  | -14.96 | 1.32E-50  | 8.20E-48  |
| SKIV2L       | 6   | rs17421624       | 28.90           | rs391165   | 13.27  | -16.47          | 222  | -14.69 | 6.97E-49  | 4.02E-46  |
| TNXB         | 6   | rs477515         | 33.82           | rs532098   | 3.92   | 26.23           | 161  | 14.49  | 1.43E-47  | 7.70E-45  |
| DDAH2        | 6   | rs17421624       | 28.90           | rs3130287  | 5.31   | -11.59          | 242  | -14.38 | 6.50E-47  | 3.28E-44  |
| DDX39B       | 6   | rs2075800        | 27.99           | rs6929796  | -10.53 | 11.22           | 277  | -14.34 | 1.29E-46  | 6.13E-44  |
| HLA-DQB1-AS1 | 6   | rs477515         | 33.82           | rs1063355  | 12.07  | -9.35           | 220  | -14.03 | 1.04E-44  | 4.67E-42  |
| HLA-DQB2     | 6   | rs477515         | 33.82           | rs1063355  | -18.71 | -9.43           | 260  | 13.85  | 1.31E-43  | 5.57E-41  |
| SLC44A4      | 6   | rs17421624       | 28.90           | rs605203   | 4.54   | -15.63          | 226  | -13.19 | 1.04E-39  | 4.20E-37  |
| IFITM4P      | 6   | rs1362126        | 7.95            | rs1362126  | 7.78   | 7.95            | 38   | 12.86  | 7.23E-38  | 2.78E-35  |
| FKBP1        | 6   | rs477515         | 33.82           | rs12153855 | 6.33   | -14.06          | 163  | -12.31 | 8.46E-35  | 3.11E-32  |
| FLOT1        | 6   | rs1265096        | 18.57           | rs13200022 | -4.94  | -9.65           | 77   | 12.20  | 3.13E-34  | 1.10E-31  |

|                    |   |            |        |            |       |        |     |        |          |          |
|--------------------|---|------------|--------|------------|-------|--------|-----|--------|----------|----------|
| HLA-DQA1           | 6 | rs477515   | 33.82  | rs1063355  | 13.17 | -9.35  | 220 | -12.04 | 2.13E-33 | 7.17E-31 |
| MICA               | 6 | rs2075800  | 27.99  | rs3093971  | 7.99  | 8.90   | 240 | 11.95  | 6.57E-33 | 2.12E-30 |
| POU5F1             | 6 | rs2844509  | -19.18 | rs1265098  | 6.95  | 8.75   | 174 | 11.60  | 4.28E-31 | 1.33E-28 |
| RPL32P1            | 6 | rs477515   | 33.82  | rs9277935  | -5.33 | -10.87 | 329 | 11.38  | 5.43E-30 | 1.62E-27 |
| RPS18              | 6 | rs3819721  | 33.27  | rs435945   | -7.20 | -6.86  | 469 | 11.27  | 1.80E-29 | 5.19E-27 |
| PPT2               | 6 | rs477515   | 33.82  | rs660594   | 3.30  | -13.19 | 165 | -11.18 | 5.21E-29 | 1.45E-26 |
| HLA-DRA            | 6 | rs477515   | 33.82  | rs2858867  | 3.34  | -26.48 | 223 | -10.74 | 6.36E-27 | 1.71E-24 |
| TAPBP              | 6 | rs3819721  | 33.27  | rs1061783  | -6.18 | -10.01 | 496 | 10.37  | 3.24E-25 | 8.44E-23 |
| HLA-B              | 6 | rs2075800  | 27.99  | rs6909321  | 9.56  | -8.26  | 216 | -10.36 | 3.84E-25 | 9.69E-23 |
| XXbac-BPG299F13.17 | 6 | rs2844509  | -19.18 | rs1966     | -7.62 | 9.61   | 174 | -10.07 | 7.80E-24 | 1.91E-21 |
| NCR3               | 6 | rs6902493  | 28.40  | rs769178   | -7.44 | -4.51  | 302 | 10.02  | 1.26E-23 | 2.99E-21 |
| RNF5               | 6 | rs477515   | 33.82  | rs498240   | -3.80 | -16.22 | 170 | 10.02  | 1.31E-23 | 3.02E-21 |
| DAXX               | 6 | rs3819721  | 33.27  | rs1061783  | 6.01  | -10.01 | 469 | -10.01 | 1.41E-23 | 3.16E-21 |
| BAG6               | 6 | rs17421624 | 28.90  | rs2534674  | -4.16 | -8.05  | 242 | 9.98   | 1.89E-23 | 4.13E-21 |
| ZBTB22             | 6 | rs3819721  | 33.27  | rs3130100  | -5.50 | -9.92  | 486 | 9.92   | 3.31E-23 | 7.03E-21 |
| MICD               | 6 | rs1362126  | 7.95   | rs1632953  | -4.52 | -5.94  | 37  | 8.83   | 1.09E-18 | 2.26E-16 |
| HLA-DQB1           | 6 | rs477515   | 33.82  | rs1063355  | 18.99 | -9.49  | 227 | -8.66  | 4.81E-18 | 9.71E-16 |
| MICE               | 6 | rs1362126  | 7.95   | rs7759272  | 5.67  | -0.69  | 38  | 8.65   | 5.02E-18 | 9.89E-16 |
| ZBTB12             | 6 | rs17421624 | 28.90  | rs3828917  | 13.27 | -8.24  | 226 | -8.64  | 5.46E-18 | 1.05E-15 |
| HLA-T              | 6 | rs1362126  | 7.95   | rs3129063  | -4.68 | -4.47  | 37  | 8.50   | 1.91E-17 | 3.59E-15 |
| HLA-DPA1           | 6 | rs477515   | 33.82  | rs34354079 | -4.16 | -8.47  | 321 | 8.03   | 9.88E-16 | 1.81E-13 |
| GPANK1             | 6 | rs17421624 | 28.90  | rs35444838 | 5.25  | -3.50  | 242 | -8.00  | 1.27E-15 | 2.28E-13 |
| ITPR3              | 6 | rs2296330  | 13.57  | rs4711336  | -9.55 | 11.65  | 518 | -7.95  | 1.85E-15 | 3.25E-13 |
| HLA-DOB            | 6 | rs477515   | 33.82  | rs4148876  | 16.08 | 12.08  | 272 | 7.77   | 7.55E-15 | 1.30E-12 |
| IER3               | 6 | rs1265096  | 18.57  | rs3130557  | 5.20  | 3.22   | 78  | 7.76   | 8.72E-15 | 1.47E-12 |
| HCG4P5             | 6 | rs1362126  | 7.95   | rs2747430  | -7.76 | -3.64  | 37  | 7.63   | 2.30E-14 | 3.79E-12 |

|           |    |            |        |           |        |        |     |       |          |          |
|-----------|----|------------|--------|-----------|--------|--------|-----|-------|----------|----------|
| LST1      | 6  | rs6902493  | 28.40  | rs4947324 | -4.92  | -8.27  | 299 | 7.61  | 2.81E-14 | 4.54E-12 |
| HLA-F     | 6  | rs1362126  | 7.95   | rs2523405 | -13.99 | 7.77   | 38  | -7.48 | 7.47E-14 | 1.18E-11 |
| HLA-J     | 6  | rs1362126  | 7.95   | rs2517910 | -6.94  | -7.38  | 37  | 7.44  | 9.82E-14 | 1.53E-11 |
| HLA-A     | 6  | rs1362126  | 7.95   | rs2747430 | -7.07  | -3.64  | 37  | 7.43  | 1.10E-13 | 1.68E-11 |
| MOG       | 6  | rs1362126  | 7.95   | rs2517910 | 3.99   | -7.38  | 38  | -7.38 | 1.59E-13 | 2.38E-11 |
| HLA-DRB5  | 6  | rs477515   | 33.82  | rs9271055 | 17.58  | -13.70 | 262 | -7.29 | 3.10E-13 | 4.55E-11 |
| HLA-DOA   | 6  | rs477515   | 33.82  | rs369150  | -7.12  | 8.89   | 293 | -7.14 | 9.37E-13 | 1.35E-10 |
| IP6K3     | 6  | rs2296330  | 13.57  | rs602399  | -3.95  | -6.94  | 516 | 6.94  | 3.89E-12 | 5.51E-10 |
| TYK2      | 19 | rs2304256  | -6.47  | rs2304256 | 6.83   | -6.47  | 376 | -6.92 | 4.46E-12 | 6.21E-10 |
| LY6G5B    | 6  | rs17421624 | 28.90  | rs1144709 | -7.22  | -7.11  | 242 | -6.82 | 8.86E-12 | 1.21E-09 |
| PTPN22    | 1  | rs2476601  | 26.04  | rs2279380 | 3.60   | 2.23   | 483 | 6.75  | 1.51E-11 | 2.03E-09 |
| AIF1      | 6  | rs17421624 | 28.90  | rs6905572 | -4.37  | 5.55   | 294 | 6.74  | 1.55E-11 | 2.05E-09 |
| ZFP57     | 6  | rs1362126  | 7.95   | rs375984  | 18.38  | -6.37  | 38  | -6.65 | 2.96E-11 | 3.86E-09 |
| SYNGR1    | 22 | rs2069235  | 6.30   | rs2069235 | 10.96  | 6.30   | 385 | 6.64  | 3.07E-11 | 3.94E-09 |
| PGBD1     | 6  | rs2232428  | -8.63  | rs1778484 | 3.72   | -6.47  | 406 | -6.47 | 1.00E-10 | 1.26E-08 |
| HSD17B8   | 6  | rs3819721  | 33.27  | rs2855448 | 4.58   | 3.44   | 404 | 6.43  | 1.26E-10 | 1.57E-08 |
| MICB      | 6  | rs2075800  | 27.99  | rs3828917 | -11.41 | -8.24  | 277 | 6.39  | 1.68E-10 | 2.06E-08 |
| CUTA      | 6  | rs453779   | -17.28 | rs7752202 | -5.78  | 9.51   | 472 | -6.37 | 1.86E-10 | 2.24E-08 |
| GABBR1    | 6  | rs1362126  | 7.95   | rs375984  | 6.90   | -6.37  | 38  | -6.37 | 1.90E-10 | 2.26E-08 |
| LINC00243 | 6  | rs1265096  | 18.57  | rs3130557 | 8.40   | 3.22   | 80  | 6.26  | 3.94E-10 | 4.61E-08 |
| CCR6      | 6  | rs3093024  | 7.62   | rs3093026 | -6.08  | -6.27  | 541 | 6.24  | 4.45E-10 | 5.13E-08 |
| BAK1      | 6  | rs2296330  | 13.57  | rs210134  | 15.86  | -5.75  | 495 | -5.88 | 4.16E-09 | 4.73E-07 |
| UBASH3A   | 21 | rs1893592  | -5.73  | rs1893592 | 12.19  | -5.73  | 759 | -5.73 | 9.81E-09 | 1.10E-06 |
| IRF5      | 7  | rs10488631 | 6.77   | rs4728142 | 14.30  | 5.86   | 332 | 5.67  | 1.40E-08 | 1.55E-06 |
| ORMDL3    | 17 | rs2872507  | 5.90   | rs8067378 | 13.07  | -5.50  | 292 | -5.65 | 1.64E-08 | 1.79E-06 |
| VWA7      | 6  | rs17421624 | 28.90  | rs409558  | -3.78  | 4.57   | 239 | -5.62 | 1.90E-08 | 2.05E-06 |

|               |    |            |       |            |        |       |     |       |          |          |
|---------------|----|------------|-------|------------|--------|-------|-----|-------|----------|----------|
| IKZF3         | 17 | rs2872507  | 5.90  | rs907091   | -6.53  | -5.50 | 291 | 5.58  | 2.34E-08 | 2.49E-06 |
| AFF3          | 2  | rs9653442  | 6.95  | rs2309811  | 5.35   | 4.49  | 456 | 5.56  | 2.67E-08 | 2.80E-06 |
| GSDMB         | 17 | rs2872507  | 5.90  | rs8067378  | 14.83  | -5.50 | 290 | -5.44 | 5.34E-08 | 5.53E-06 |
| SUOX          | 12 | rs705699   | -5.33 | rs705700   | -10.23 | -5.29 | 293 | 5.39  | 7.02E-08 | 7.18E-06 |
| PUS10         | 2  | rs34695944 | 7.55  | rs35217978 | 5.35   | 4.08  | 324 | 5.31  | 1.10E-07 | 1.11E-05 |
| RP4-730K3.3   | 1  | rs2476601  | 26.04 | rs6669008  | -5.22  | -6.59 | 486 | 5.29  | 1.21E-07 | 1.21E-05 |
| RP11-148O21.2 | 8  | rs13277113 | 5.22  | rs4840568  | -6.21  | 4.92  | 601 | -5.25 | 1.55E-07 | 1.53E-05 |
| RPL23AP1      | 6  | rs1362126  | 7.95  | rs1632957  | 10.85  | -3.18 | 38  | -5.24 | 1.57E-07 | 1.53E-05 |
| TTC34         | 1  | rs2843401  | -5.89 | rs4648356  | 6.88   | -3.76 | 369 | -5.20 | 1.99E-07 | 1.91E-05 |
| RP11-148O21.4 | 8  | rs13277113 | 5.22  | rs2736340  | -5.08  | 5.18  | 602 | -5.18 | 2.20E-07 | 2.09E-05 |
| PHF19         | 9  | rs10818482 | 5.62  | rs11794516 | -4.21  | 5.42  | 357 | -5.14 | 2.80E-07 | 2.63E-05 |
| RPS26         | 12 | rs705699   | -5.33 | rs10876864 | 19.31  | -4.79 | 290 | -5.06 | 4.17E-07 | 3.87E-05 |
| INPP5B        | 1  | rs28411352 | 5.84  | rs36084352 | -15.31 | -4.01 | 459 | 4.98  | 6.29E-07 | 5.77E-05 |
| FADS2         | 11 | rs968567   | -4.95 | rs968567   | 18.57  | -4.95 | 414 | -4.98 | 6.49E-07 | 5.89E-05 |
| HCG4P7        | 6  | rs1362126  | 7.95  | rs1362126  | -4.84  | 7.95  | 38  | -4.90 | 9.46E-07 | 8.49E-05 |
| IFNGR2        | 21 | rs11702844 | -5.33 | rs9808753  | 6.71   | -4.89 | 463 | -4.89 | 9.98E-07 | 8.86E-05 |
| RP11-973H7.4  | 18 | rs12971201 | -5.84 | rs2542157  | -10.13 | -4.83 | 394 | 4.88  | 1.08E-06 | 9.48E-05 |
| C6orf48       | 6  | rs17421624 | 28.90 | rs3749953  | -8.28  | 5.65  | 239 | -4.86 | 1.18E-06 | 1.02E-04 |
| HCG9          | 6  | rs1362126  | 7.95  | rs1632953  | -5.72  | -5.94 | 37  | 4.84  | 1.31E-06 | 1.13E-04 |
| TMEM258       | 11 | rs968567   | -4.95 | rs174538   | 5.53   | -3.66 | 401 | -4.77 | 1.87E-06 | 1.59E-04 |
| NEU1          | 6  | rs17421624 | 28.90 | rs3117575  | -4.46  | -3.00 | 226 | 4.74  | 2.11E-06 | 1.78E-04 |
| FAM167A       | 8  | rs13277113 | 5.22  | rs4840568  | 12.60  | 4.92  | 624 | 4.68  | 2.88E-06 | 2.40E-04 |
| HLA-DPB1      | 6  | rs477515   | 33.82 | rs34354079 | -4.25  | -8.47 | 328 | 4.65  | 3.35E-06 | 2.76E-04 |
| RP11-973H7.1  | 18 | rs12971201 | -5.84 | rs2542157  | -10.08 | -4.83 | 385 | 4.63  | 3.63E-06 | 2.96E-04 |
| PGAP3         | 17 | rs2872507  | 5.90  | rs3816470  | 3.35   | -5.47 | 318 | -4.63 | 3.73E-06 | 3.01E-04 |
| VAR52         | 6  | rs1265096  | 18.57 | rs3130557  | -5.82  | 3.22  | 93  | 4.62  | 3.87E-06 | 3.09E-04 |

|                    |    |            |       |            |        |       |     |       |          |          |
|--------------------|----|------------|-------|------------|--------|-------|-----|-------|----------|----------|
| FADS1              | 11 | rs968567   | -4.95 | rs102275   | 5.61   | -3.34 | 421 | -4.55 | 5.30E-06 | 4.20E-04 |
| COL11A2            | 6  | rs3819721  | 33.27 | rs2229784  | 5.30   | -4.53 | 385 | -4.53 | 5.90E-06 | 4.63E-04 |
| HCG4P3             | 6  | rs1362126  | 7.95  | rs3129063  | 5.21   | -4.47 | 37  | -4.47 | 7.79E-06 | 6.05E-04 |
| TSPAN31            | 12 | rs238516   | -5.22 | rs701008   | -5.21  | -4.43 | 341 | 4.43  | 9.60E-06 | 7.38E-04 |
| METTL21B           | 12 | rs238516   | -5.22 | rs10877016 | 14.61  | -4.46 | 347 | -4.40 | 1.06E-05 | 8.08E-04 |
| RP11-309L24.10     | 7  | rs10488631 | 6.77  | rs10239340 | 11.71  | -4.40 | 330 | -4.40 | 1.10E-05 | 8.30E-04 |
| FCRL3              | 1  | rs3761959  | 4.38  | rs3761959  | 12.18  | 4.38  | 537 | 4.38  | 1.20E-05 | 8.89E-04 |
| TRIM10             | 6  | rs1362126  | 7.95  | rs1632957  | -4.12  | -3.18 | 37  | 4.38  | 1.20E-05 | 8.89E-04 |
| NOTCH4             | 6  | rs477515   | 33.82 | rs11969759 | 7.42   | 3.85  | 170 | 4.35  | 1.38E-05 | 1.01E-03 |
| FAM213B            | 1  | rs2843401  | -5.89 | rs4445406  | -9.05  | -5.23 | 366 | 4.33  | 1.49E-05 | 1.08E-03 |
| FCRL1              | 1  | rs3761959  | 4.38  | rs6689427  | -8.28  | 3.72  | 500 | -4.28 | 1.84E-05 | 1.33E-03 |
| BLK                | 8  | rs13277113 | 5.22  | rs998683   | -9.51  | 4.83  | 629 | -4.28 | 1.89E-05 | 1.35E-03 |
| TRAF1              | 9  | rs10818482 | 5.62  | rs10760130 | 6.60   | 5.33  | 347 | 4.26  | 2.07E-05 | 1.47E-03 |
| DDR1               | 6  | rs1265096  | 18.57 | rs28732100 | 5.06   | -4.25 | 93  | -4.25 | 2.10E-05 | 1.47E-03 |
| UBE2L3             | 22 | rs11089637 | 5.00  | rs4821130  | 8.48   | 4.31  | 286 | 4.25  | 2.12E-05 | 1.48E-03 |
| MMEL1              | 1  | rs2843401  | -5.89 | rs3748816  | -9.37  | -5.55 | 356 | 4.23  | 2.33E-05 | 1.61E-03 |
| ZNRD1              | 6  | rs1362126  | 7.95  | rs3129063  | -3.14  | -4.47 | 37  | 4.19  | 2.84E-05 | 1.94E-03 |
| SPNS1              | 16 | rs7500321  | 4.45  | rs8045689  | 14.21  | 4.17  | 183 | 4.15  | 3.25E-05 | 2.21E-03 |
| IL12RB2            | 1  | rs6679356  | 4.59  | rs17129794 | 10.42  | 4.44  | 498 | 4.13  | 3.69E-05 | 2.48E-03 |
| TMEM50B            | 21 | rs11702844 | -5.33 | rs2284555  | -10.23 | -4.09 | 458 | 4.12  | 3.76E-05 | 2.51E-03 |
| TRIM27             | 6  | rs13190937 | -7.31 | rs9468385  | 5.47   | -0.63 | 38  | -4.12 | 3.79E-05 | 2.51E-03 |
| XXbac-BPG248L24.12 | 6  | rs2075800  | 27.99 | rs2844623  | 9.58   | 5.11  | 216 | 4.08  | 4.44E-05 | 2.92E-03 |
| LINC00593          | 15 | rs8026898  | 8.47  | rs4777182  | -4.05  | -4.55 | 533 | 4.03  | 5.67E-05 | 3.69E-03 |
| CTD-2574D22.4      | 16 | rs4787495  | 4.02  | rs4238961  | 4.47   | -2.72 | 181 | -4.01 | 6.09E-05 | 3.93E-03 |
| LINC01125          | 2  | rs12989231 | 4.16  | rs298913   | 4.22   | 2.71  | 143 | 3.94  | 8.00E-05 | 5.13E-03 |
| TOP1MT             | 8  | rs878238   | 3.32  | rs3814772  | -5.21  | -2.13 | 369 | 3.91  | 9.35E-05 | 5.95E-03 |

|               |    |            |       |            |       |       |     |       |          |          |
|---------------|----|------------|-------|------------|-------|-------|-----|-------|----------|----------|
| GIN1          | 5  | rs35801    | -6.18 | rs26262    | -3.97 | -3.85 | 318 | 3.90  | 9.59E-05 | 6.00E-03 |
| RP11-235E17.6 | 17 | rs11657606 | -3.77 | rs220488   | -3.30 | -2.48 | 528 | 3.90  | 9.56E-05 | 6.00E-03 |
| CCT6P2        | 5  | rs13189930 | 4.74  | rs31929    | -4.95 | 3.87  | 467 | -3.87 | 1.10E-04 | 6.83E-03 |
| FCGR2B        | 1  | rs1801274  | 5.33  | rs35835689 | 9.57  | 2.96  | 477 | 3.86  | 1.12E-04 | 6.90E-03 |
| RNF40         | 16 | rs8058578  | 4.67  | rs8058578  | 6.39  | 4.67  | 209 | 3.86  | 1.13E-04 | 6.91E-03 |
| ATP13A2       | 1  | rs2240335  | -5.78 | rs2076600  | -5.11 | -3.34 | 344 | 3.81  | 1.39E-04 | 8.44E-03 |
| DDX6          | 11 | rs4938573  | -7.76 | rs2077579  | -5.61 | -7.60 | 363 | 3.80  | 1.43E-04 | 8.62E-03 |
| AC093162.5    | 2  | rs10460586 | 3.94  | rs1053560  | -8.31 | 3.79  | 446 | -3.79 | 1.49E-04 | 8.91E-03 |
| TCF7L1        | 2  | rs10460586 | 3.94  | rs1053560  | -8.01 | 3.79  | 411 | -3.78 | 1.58E-04 | 9.38E-03 |
| TSSK6         | 19 | rs11085264 | 4.24  | rs998732   | 5.71  | 3.76  | 356 | 3.76  | 1.70E-04 | 1.00E-02 |
| PSMD5         | 9  | rs10818482 | 5.62  | rs7037673  | -4.71 | -4.42 | 368 | 3.75  | 1.75E-04 | 1.02E-02 |
| ZNF322        | 6  | rs17539358 | 6.09  | rs6931849  | 8.92  | 3.79  | 428 | 3.74  | 1.85E-04 | 1.07E-02 |
| HSPA7         | 1  | rs1801274  | 5.33  | rs12142755 | -5.96 | 1.73  | 449 | -3.73 | 1.93E-04 | 1.11E-02 |
| PLCL1         | 2  | rs1065953  | -4.25 | rs1579695  | 11.53 | -3.78 | 308 | -3.72 | 1.96E-04 | 1.12E-02 |
| SH2B1         | 16 | rs7500321  | 4.45  | rs8062405  | -3.97 | 3.72  | 182 | -3.72 | 2.00E-04 | 1.14E-02 |
| FAM213A       | 10 | rs2343306  | 4.47  | rs12220642 | -8.25 | 3.98  | 547 | -3.72 | 2.03E-04 | 1.15E-02 |
| OPRL1         | 20 | rs4408777  | 3.48  | rs8121509  | -9.11 | 3.41  | 312 | -3.71 | 2.10E-04 | 1.18E-02 |
| HLA-G         | 6  | rs1362126  | 7.95  | rs9501414  | -3.40 | -0.43 | 38  | 3.67  | 2.41E-04 | 1.34E-02 |
| TUFM          | 16 | rs7500321  | 4.45  | rs8049439  | 18.02 | 3.75  | 182 | 3.63  | 2.80E-04 | 1.55E-02 |
| EDEM2         | 20 | rs3746429  | -3.60 | rs3746429  | -6.19 | -3.60 | 345 | 3.62  | 2.97E-04 | 1.63E-02 |
| ZNF831        | 20 | rs259956   | 3.64  | rs259964   | -4.40 | 3.62  | 537 | -3.62 | 3.00E-04 | 1.63E-02 |
| EDN3          | 20 | rs259956   | 3.64  | rs259964   | -6.46 | 3.62  | 554 | -3.62 | 3.00E-04 | 1.63E-02 |
| MYL6          | 12 | rs705699   | -5.33 | rs773649   | 3.77  | -3.61 | 276 | -3.61 | 3.10E-04 | 1.67E-02 |
| SMG1P5        | 16 | rs8058578  | 4.67  | rs9924308  | -8.18 | 3.83  | 209 | -3.60 | 3.15E-04 | 1.68E-02 |
| NMI           | 2  | rs446791   | -3.66 | rs4664349  | 5.87  | 2.66  | 448 | 3.59  | 3.32E-04 | 1.76E-02 |
| PSD4          | 2  | rs3791336  | -3.95 | rs3791336  | 16.52 | -3.95 | 451 | -3.55 | 3.85E-04 | 2.03E-02 |

|                |    |            |       |            |        |        |     |       |          |          |
|----------------|----|------------|-------|------------|--------|--------|-----|-------|----------|----------|
| ZSCAN26        | 6  | rs2232428  | -8.63 | rs12214383 | -5.35  | -3.87  | 413 | 3.53  | 4.13E-04 | 2.17E-02 |
| JOSD1          | 22 | rs6001251  | -3.63 | rs5750668  | -5.35  | 2.68   | 374 | -3.53 | 4.23E-04 | 2.20E-02 |
| C4B            | 6  | rs17421624 | 28.90 | rs1150753  | 11.43  | -5.33  | 189 | -3.52 | 4.37E-04 | 2.26E-02 |
| ZNF438         | 10 | rs867768   | 4.66  | rs2256726  | -6.25  | 3.38   | 417 | -3.50 | 4.58E-04 | 2.36E-02 |
| MAPK3          | 16 | rs12918327 | 4.62  | rs2005219  | 11.49  | -3.18  | 227 | -3.50 | 4.64E-04 | 2.37E-02 |
| PDHB           | 3  | rs2176082  | 3.81  | rs4390943  | -7.65  | 3.48   | 433 | -3.50 | 4.71E-04 | 2.39E-02 |
| NA             | 2  | rs3821236  | 6.86  | rs12693581 | -7.22  | -3.35  | 372 | 3.47  | 5.17E-04 | 2.59E-02 |
| AP003774.1     | 11 | rs660442   | -3.72 | rs479777   | 15.65  | -3.66  | 353 | -3.47 | 5.16E-04 | 2.59E-02 |
| HOTAIRM1       | 7  | rs6953314  | -4.06 | rs2960785  | -16.74 | 3.02   | 420 | -3.47 | 5.22E-04 | 2.60E-02 |
| PIIP5K2        | 5  | rs35801    | -6.18 | rs1011454  | -15.03 | -3.78  | 318 | 3.47  | 5.28E-04 | 2.61E-02 |
| ATXN2L         | 16 | rs7500321  | 4.45  | rs2008514  | -6.98  | 3.47   | 181 | -3.47 | 5.30E-04 | 2.61E-02 |
| RP11-122G18.11 | 1  | rs1801274  | 5.33  | rs4656298  | -8.23  | 3.46   | 407 | -3.46 | 5.50E-04 | 2.66E-02 |
| "NABP2"        | 12 | rs705699   | -5.33 | rs773643   | -4.34  | -2.95  | 258 | 3.46  | 5.49E-04 | 2.66E-02 |
| ATP2A1         | 16 | rs7500321  | 4.45  | rs12325113 | 3.89   | 3.72   | 182 | 3.46  | 5.44E-04 | 2.66E-02 |
| EIF3C          | 16 | rs7500321  | 4.45  | rs149299   | 5.35   | 1.81   | 201 | 3.43  | 6.06E-04 | 2.91E-02 |
| CNTRL          | 9  | rs10818482 | 5.62  | rs2209076  | 6.07   | -2.79  | 380 | -3.41 | 6.38E-04 | 3.05E-02 |
| HLA-DMA        | 6  | rs477515   | 33.82 | rs2854275  | 4.69   | -11.84 | 286 | -3.41 | 6.50E-04 | 3.08E-02 |
| RP11-347C12.12 | 16 | rs8058578  | 4.67  | rs13331817 | -5.43  | 3.29   | 209 | -3.41 | 6.52E-04 | 3.08E-02 |
| WAPL           | 10 | rs3858279  | -3.26 | rs10887608 | 4.34   | -3.18  | 440 | -3.40 | 6.74E-04 | 3.16E-02 |
| SF3A3          | 1  | rs28411352 | 5.84  | rs4634868  | 12.20  | 1.78   | 468 | 3.39  | 6.89E-04 | 3.22E-02 |
| RP1-221C16.8   | 6  | rs17539358 | 6.09  | rs4486004  | -6.94  | 2.62   | 667 | -3.39 | 7.00E-04 | 3.25E-02 |
| RP11-122G18.12 | 1  | rs1801274  | 5.33  | rs4656298  | -7.68  | 3.46   | 396 | -3.36 | 7.66E-04 | 3.53E-02 |
| CCR3           | 3  | rs6762266  | -4.59 | rs7616215  | -9.62  | 1.76   | 458 | -3.35 | 7.97E-04 | 3.66E-02 |
| PAM            | 5  | rs26258    | -4.22 | rs2431321  | 15.59  | -3.35  | 306 | -3.35 | 8.11E-04 | 3.70E-02 |
| DAP            | 5  | rs267949   | 4.91  | rs5745297  | 10.38  | -0.48  | 628 | -3.32 | 8.93E-04 | 4.05E-02 |
| HIST1H2BG      | 6  | rs17539358 | 6.09  | rs9467700  | 4.29   | -3.22  | 642 | -3.31 | 9.20E-04 | 4.15E-02 |



|           |    |            |       |            |       |       |     |       |          |          |
|-----------|----|------------|-------|------------|-------|-------|-----|-------|----------|----------|
| YAF2      | 12 | rs7954523  | -3.75 | rs1669909  | -4.76 | -3.30 | 421 | 3.30  | 9.70E-04 | 4.35E-02 |
| HIST1H2BF | 6  | rs17539358 | 6.09  | rs2143347  | 4.46  | 2.06  | 652 | 3.30  | 9.80E-04 | 4.37E-02 |
| FBXO40    | 3  | rs4413346  | -3.77 | rs1492177  | 6.37  | 3.37  | 342 | 3.29  | 1.01E-03 | 4.46E-02 |
| KIAA1191  | 5  | rs1030167  | -3.31 | rs1030167  | 6.75  | -3.31 | 314 | -3.26 | 1.10E-03 | 4.80E-02 |
| C6orf106  | 6  | rs2814943  | 3.41  | rs16894959 | 7.51  | 3.26  | 338 | 3.26  | 1.10E-03 | 4.80E-02 |
| NPIPB7    | 16 | rs7500321  | 4.45  | rs34835    | -9.58 | 3.26  | 213 | -3.26 | 1.10E-03 | 4.80E-02 |
| LMNB1     | 5  | rs11749892 | 3.16  | rs2271354  | 6.09  | 1.91  | 392 | 3.25  | 1.14E-03 | 4.95E-02 |
| CMAHP     | 6  | rs3804133  | 5.11  | rs9295647  | 6.67  | 2.66  | 614 | 3.25  | 1.15E-03 | 4.97E-02 |

**Supplementary Table 4. TWAS summary statistics in single-tissue test using peripheral blood eQTL from NTR**

| Gene     | CHR | BEST.<br>GWAS.ID | BEST.<br>GWAS.Z | EQTL.ID    | EQTL.Z | EQTL.<br>GWAS.Z | NSNP | TWAS.Z | TWAS.P    | FDR       |
|----------|-----|------------------|-----------------|------------|--------|-----------------|------|--------|-----------|-----------|
| HSPA1B   | 6   | rs17421624       | 28.90           | rs614549   | 7.02   | 26.22           | 236  | 27.02  | 8.66E-161 | 2.12E-157 |
| HLA-DRB5 | 6   | rs660895         | 33.82           | rs9271055  | 23.84  | -13.70          | 252  | -25.64 | 5.85E-145 | 7.16E-142 |
| MICA     | 6   | rs2075800        | 27.99           | rs2844509  | -3.64  | -19.18          | 238  | 21.91  | 2.26E-106 | 1.84E-103 |
| SLC44A4  | 6   | rs17421624       | 28.90           | rs605203   | 12.78  | -15.63          | 221  | -15.68 | 2.22E-55  | 1.36E-52  |
| BAT1     | 6   | rs2075800        | 27.99           | rs9267576  | 5.09   | -12.09          | 273  | -14.81 | 1.26E-49  | 6.17E-47  |
| IER3     | 6   | rs1265096        | 18.57           | rs3130557  | 11.02  | 3.22            | 77   | 12.20  | 3.21E-34  | 1.31E-31  |
| HLA-DOA  | 6   | rs660895         | 33.82           | rs447088   | -4.76  | 11.16           | 280  | -11.16 | 6.47E-29  | 2.26E-26  |
| HLA-A    | 6   | rs1362126        | 7.95            | rs1632953  | -8.60  | -5.94           | 41   | 9.41   | 4.91E-21  | 1.50E-18  |
| FLOT1    | 6   | rs1265096        | 18.57           | rs3130564  | 6.18   | 11.18           | 76   | 9.35   | 8.96E-21  | 2.44E-18  |
| HLA-DQA1 | 6   | rs660895         | 33.82           | rs1063355  | 18.50  | -8.04           | 212  | -9.04  | 1.62E-19  | 3.96E-17  |
| HLA-DOB  | 6   | rs660895         | 33.82           | rs4148876  | 12.19  | 12.08           | 261  | 8.69   | 3.76E-18  | 8.36E-16  |
| HLA-F    | 6   | rs1362126        | 7.95            | rs2523405  | -17.88 | 7.77            | 42   | -7.67  | 1.66E-14  | 3.39E-12  |
| ZNRD1    | 6   | rs1362126        | 7.95            | rs375984   | -2.68  | -6.37           | 41   | 7.51   | 5.75E-14  | 1.08E-11  |
| DDAH2    | 6   | rs17421624       | 28.90           | rs389883   | 3.97   | -14.01          | 239  | -7.24  | 4.35E-13  | 7.60E-11  |
| MICB     | 6   | rs2075800        | 27.99           | rs3828917  | -9.95  | -8.24           | 273  | 7.13   | 1.03E-12  | 1.68E-10  |
| HLA-DPA1 | 6   | rs660895         | 33.82           | rs34354079 | -5.26  | -8.47           | 306  | 7.03   | 2.01E-12  | 3.07E-10  |
| TAP2     | 6   | rs660895         | 33.82           | rs241440   | 18.19  | -5.85           | 261  | -6.39  | 1.62E-10  | 2.33E-08  |
| HLA-G    | 6   | rs1362126        | 7.95            | rs375984   | 6.67   | -6.37           | 42   | -5.74  | 9.58E-09  | 1.30E-06  |
| IKZF3    | 17  | rs2872507        | 5.90            | rs10445308 | 6.66   | 5.72            | 319  | 5.72   | 1.10E-08  | 1.42E-06  |
| ORMDL3   | 17  | rs2872507        | 5.90            | rs10852936 | -11.59 | 5.87            | 290  | -5.56  | 2.74E-08  | 3.35E-06  |
| GSDMB    | 17  | rs2872507        | 5.90            | rs3816470  | 11.42  | -5.47           | 289  | -5.46  | 4.81E-08  | 5.60E-06  |
| EOMES    | 3   | rs3806624        | 5.42            | rs3806624  | 5.78   | 5.42            | 412  | 5.42   | 6.09E-08  | 6.77E-06  |
| CD40     | 20  | rs4239702        | -7.55           | rs9074     | -4.38  | -6.29           | 497  | 5.38   | 7.44E-08  | 7.92E-06  |

|           |    |            |       |            |        |       |     |       |          |          |
|-----------|----|------------|-------|------------|--------|-------|-----|-------|----------|----------|
| C6orf48   | 6  | rs17421624 | 28.90 | rs11965547 | -4.35  | 6.35  | 236 | -5.20 | 2.02E-07 | 1.98E-05 |
| SYNGR1    | 22 | rs2069235  | 6.30  | rs2069235  | 6.44   | 6.30  | 392 | 5.20  | 2.00E-07 | 1.98E-05 |
| FADS2     | 11 | rs968567   | -4.95 | rs968567   | 20.25  | -4.95 | 432 | -4.95 | 7.38E-07 | 6.95E-05 |
| MKRN2     | 3  | rs6442323  | -4.50 | rs2344825  | -7.51  | 4.01  | 486 | -4.93 | 8.30E-07 | 7.52E-05 |
| AFF3      | 2  | rs9653442  | 6.95  | rs4851274  | 4.25   | 4.29  | 626 | 4.64  | 3.51E-06 | 3.07E-04 |
| HIST1H4F  | 6  | rs17539358 | 6.09  | rs17600910 | 4.56   | 4.57  | 605 | 4.57  | 4.81E-06 | 4.06E-04 |
| ANKRD55   | 5  | rs10065637 | -8.11 | rs4700266  | 5.04   | 1.41  | 560 | 4.52  | 6.15E-06 | 4.90E-04 |
| ACAT1     | 11 | rs4988023  | -4.30 | rs4754317  | 5.68   | -4.03 | 369 | -4.52 | 6.21E-06 | 4.90E-04 |
| ZFP57     | 6  | rs1362126  | 7.95  | rs3129063  | 5.55   | -4.47 | 42  | -4.47 | 7.79E-06 | 5.96E-04 |
| HIST1H2BG | 6  | rs17539358 | 6.09  | rs989710   | 9.21   | 4.42  | 623 | 4.42  | 1.00E-05 | 7.42E-04 |
| FCRL3     | 1  | rs3761959  | 4.38  | rs3761959  | 13.76  | 4.38  | 537 | 4.38  | 1.17E-05 | 8.42E-04 |
| TAGAP     | 6  | rs654690   | -6.16 | rs926657   | -7.34  | -4.13 | 566 | 4.33  | 1.51E-05 | 1.04E-03 |
| FAM119B   | 12 | rs238516   | -5.22 | rs11172349 | 13.40  | -4.40 | 341 | -4.32 | 1.53E-05 | 1.04E-03 |
| CFLAR     | 2  | rs16837131 | 5.02  | rs13015798 | 5.30   | -3.41 | 401 | -4.31 | 1.60E-05 | 1.06E-03 |
| INPP5B    | 1  | rs28411352 | 5.84  | rs4585948  | -6.90  | -4.17 | 498 | 4.23  | 2.33E-05 | 1.50E-03 |
| TNPO3     | 7  | rs10488631 | 6.77  | rs6969930  | 5.24   | -4.42 | 343 | -4.15 | 3.32E-05 | 2.08E-03 |
| HLA-B     | 6  | rs2075800  | 27.99 | rs3130564  | -13.95 | 11.18 | 214 | -4.11 | 3.90E-05 | 2.39E-03 |
| ALDH2     | 12 | rs3184504  | 5.12  | rs16941669 | 5.65   | -1.76 | 222 | -4.10 | 4.18E-05 | 2.49E-03 |
| DAP       | 5  | rs267949   | 4.91  | rs267949   | -5.19  | 4.91  | 676 | -4.08 | 4.60E-05 | 2.68E-03 |
| GATAD2A   | 19 | rs11085264 | 4.24  | rs2285627  | 5.51   | 3.52  | 386 | 3.93  | 8.60E-05 | 4.89E-03 |
| RNF41     | 12 | rs705699   | -5.33 | rs773122   | -3.96  | -3.90 | 254 | 3.78  | 1.54E-04 | 8.56E-03 |
| CCR3      | 3  | rs6762266  | -4.59 | rs7616215  | -12.86 | 1.76  | 473 | -3.77 | 1.65E-04 | 8.97E-03 |
| OCIAD1    | 4  | rs6838613  | -4.04 | rs2712156  | -4.50  | -3.67 | 207 | 3.67  | 2.40E-04 | 1.25E-02 |
| PPIP5K2   | 5  | rs35801    | -6.18 | rs26433    | -7.73  | -3.87 | 353 | 3.68  | 2.37E-04 | 1.25E-02 |
| C11orf10  | 11 | rs968567   | -4.95 | rs174538   | 10.24  | -3.66 | 399 | -3.66 | 2.50E-04 | 1.27E-02 |
| 2-Sep     | 2  | rs6437249  | -3.36 | rs11681497 | 11.31  | -2.61 | 343 | -3.64 | 2.74E-04 | 1.37E-02 |

|           |    |            |        |            |        |       |     |       |          |          |
|-----------|----|------------|--------|------------|--------|-------|-----|-------|----------|----------|
| TXK       | 4  | rs2352593  | 4.49   | rs4695345  | 4.75   | -2.54 | 398 | -3.60 | 3.23E-04 | 1.55E-02 |
| NCOR1     | 17 | rs11657857 | -3.41  | rs11650427 | -4.17  | -2.89 | 321 | 3.60  | 3.19E-04 | 1.55E-02 |
| ANKRD28   | 3  | rs11917845 | 3.56   | rs11917845 | 6.36   | 3.56  | 522 | 3.56  | 3.69E-04 | 1.74E-02 |
| FCGR2B    | 1  | rs1801274  | 5.33   | rs35835689 | 10.51  | 2.96  | 511 | 3.48  | 4.94E-04 | 2.28E-02 |
| PLEKHA1   | 10 | rs7097701  | 3.48   | rs6585827  | -7.92  | 3.45  | 605 | -3.45 | 5.61E-04 | 2.54E-02 |
| CCR1      | 3  | rs6762266  | -4.59  | rs7616215  | 12.77  | 1.76  | 470 | 3.41  | 6.50E-04 | 2.89E-02 |
| NPAT      | 11 | rs4988023  | -4.30  | rs2356801  | -4.48  | 2.23  | 380 | -3.40 | 6.78E-04 | 2.96E-02 |
| C6orf106  | 6  | rs2814943  | 3.41   | rs2814983  | 5.53   | 3.38  | 376 | 3.38  | 7.30E-04 | 3.13E-02 |
| TCF19     | 6  | rs2844509  | -19.18 | rs2233976  | 7.02   | -3.37 | 177 | -3.37 | 7.60E-04 | 3.16E-02 |
| WEE1      | 11 | rs2082807  | -3.38  | rs12422111 | -3.99  | 1.31  | 367 | -3.37 | 7.61E-04 | 3.16E-02 |
| ZNF48     | 16 | rs8058578  | 4.67   | rs2230434  | -3.63  | 0.09  | 196 | -3.36 | 7.82E-04 | 3.19E-02 |
| PAM       | 5  | rs35801    | -6.18  | rs2431321  | 19.07  | -3.35 | 343 | -3.35 | 8.11E-04 | 3.20E-02 |
| HIST1H2AC | 6  | rs17539358 | 6.09   | rs198829   | -6.29  | -3.05 | 662 | 3.35  | 8.01E-04 | 3.20E-02 |
| RETSAT    | 2  | rs10460586 | 3.94   | rs1044973  | -11.01 | 3.75  | 452 | -3.34 | 8.35E-04 | 3.24E-02 |
| IFI30     | 19 | rs874628   | -3.57  | rs11554159 | 5.52   | -3.29 | 406 | -3.29 | 9.98E-04 | 3.82E-02 |
| HMGN4     | 6  | rs17539358 | 6.09   | rs6926629  | 9.46   | -2.66 | 464 | -3.27 | 1.07E-03 | 4.03E-02 |

**Supplementary Table 5. Significant TWAS signals were validated in peripheral blood**

| Gene      | CHR | TWAS_Z_NTR | TWAS_P_NTR | TWAS_Z_WB | TWAS_P_WB | Category     |
|-----------|-----|------------|------------|-----------|-----------|--------------|
| FCRL3     | 1   | 4.38       | 1.17E-05   | 4.38      | 1.20E-05  | Known region |
| INPP5B    | 1   | 4.23       | 2.33E-05   | 4.98      | 6.29E-07  | Known region |
| AFF3      | 2   | 4.64       | 3.51E-06   | 5.56      | 2.67E-08  | Known region |
| DAP       | 5   | -4.08      | 4.60E-05   | -3.32     | 8.93E-04  | Known region |
| PAM       | 5   | -3.35      | 8.11E-04   | -3.35     | 8.11E-04  | Known region |
| PIIP5K2   | 5   | 3.68       | 2.37E-04   | 3.47      | 5.28E-04  | Known region |
| C6orf106  | 6   | 3.38       | 7.30E-04   | 3.26      | 1.10E-03  | Known region |
| HIST1H2BG | 6   | 4.42       | 1.00E-05   | -3.31     | 9.20E-04  | new          |
| GSDMB     | 17  | -5.46      | 4.81E-08   | -5.44     | 5.34E-08  | Known region |
| IKZF3     | 17  | 5.72       | 1.10E-08   | 5.58      | 2.34E-08  | Known region |
| ORMDL3    | 17  | -5.56      | 2.74E-08   | -5.65     | 1.64E-08  | Known region |

**Supplementary Table 6. List of overlapping genes identified by TWAS and GEO mRNA profiling for RA.**

| Gene           | CytoBand | Z score | TWAS <i>P</i> -value | TWAS FDR | t-statistics | GEO <i>P</i> -value | GEO FDR  | Regulation |
|----------------|----------|---------|----------------------|----------|--------------|---------------------|----------|------------|
| <i>PTPN22</i>  | 1p13.2   | 6.75    | 1.51E-11             | 2.03E-09 | 4.99         | 1.06E-06            | 8.08E-06 | UP         |
| <i>PUS10</i>   | 2p15     | 5.31    | 1.10E-07             | 1.11E-05 | 5.67         | 3.64E-08            | 4.00E-07 | UP         |
| <i>PPIP5K2</i> | 5q21.1   | 3.47    | 5.28E-04             | 2.61E-02 | 5.05         | 7.88E-07            | 6.20E-06 | UP         |
| <i>ZNF322</i>  | 6p22.2   | 3.74    | 1.85E-04             | 1.07E-02 | 7.79         | 1.31E-13            | 5.65E-12 | UP         |
| <i>IRF5</i>    | 7q32.1   | 5.67    | 1.40E-08             | 1.55E-06 | 3.12         | 2.03E-03            | 6.44E-03 | UP         |
| <i>PSMD5</i>   | 9q33.2   | 3.75    | 1.75E-04             | 1.02E-02 | 4.83         | 2.24E-06            | 1.60E-05 | UP         |
| <i>YAF2</i>    | 12q12    | 3.30    | 9.70E-04             | 4.35E-02 | 5.95         | 8.07E-09            | 1.05E-07 | UP         |
| <i>TMEM50B</i> | 21q22.11 | 4.12    | 3.76E-05             | 2.51E-03 | 7.35         | 2.21E-12            | 6.96E-11 | UP         |
| <i>PGBD1</i>   | 6p22.1   | -6.47   | 1.00E-10             | 1.26E-08 | -2.15        | 3.28E-02            | 6.95E-02 | DOWN       |
| <i>PHF19</i>   | 9q33.2   | -5.14   | 2.80E-07             | 2.63E-05 | -2.32        | 2.12E-02            | 4.84E-02 | DOWN       |
| <i>PGAP3</i>   | 17q12    | -4.63   | 3.73E-06             | 3.01E-04 | -3.71        | 2.50E-04            | 1.04E-03 | DOWN       |
| <i>GSDMB</i>   | 17q21.1  | -5.44   | 5.34E-08             | 5.53E-06 | -2.72        | 6.93E-03            | 1.85E-02 | DOWN       |
| <i>ORMDL3</i>  | 17q21.1  | -5.65   | 1.64E-08             | 1.79E-06 | -2.89        | 4.16E-03            | 1.20E-02 | DOWN       |
| <i>TYK2</i>    | 19p13.2  | -6.92   | 4.46E-12             | 6.21E-10 | -2.72        | 6.96E-03            | 1.86E-02 | DOWN       |
| <i>UBASH3A</i> | 21q22.3  | -5.73   | 9.81E-09             | 1.10E-06 | -6.49        | 3.87E-10            | 7.08E-09 | DOWN       |

**Supplementary Table 7. Gene-set analysis by TWAS-based enrichment analysis**

| GeneSet                                           | Estimate | SE    | T     | N_Mem_<br>Avail | N_Mem | P        | P.CORR   |
|---------------------------------------------------|----------|-------|-------|-----------------|-------|----------|----------|
| KEGG_AUTOIMMUNE_THYROID_DISEASE                   | 1.163    | 0.229 | 5.071 | 18              | 52    | 1.98E-07 | 1.46E-05 |
| KEGG_ALLOGRAFT_REJECTION                          | 1.163    | 0.229 | 5.071 | 18              | 37    | 1.98E-07 | 1.46E-05 |
| KEGG_GRAFT_VERSUS_HOST_DISEASE                    | 1.049    | 0.218 | 4.820 | 20              | 41    | 7.18E-07 | 3.54E-05 |
| KEGG_TYPE_I_DIABETES_MELLITUS                     | 0.997    | 0.225 | 4.429 | 19              | 43    | 4.72E-06 | 1.75E-04 |
| KEGG_VIRAL_MYOCARDITIS                            | 0.732    | 0.177 | 4.133 | 31              | 70    | 1.79E-05 | 5.29E-04 |
| KEGG_ANTIGEN_PROCESSING_AND_PRESENTATION          | 0.655    | 0.177 | 3.702 | 35              | 88    | 1.07E-04 | 2.64E-03 |
| KEGG_INTESTINAL_IMMUNE_NETWORK_FOR_IGA_PRODUCTION | 0.859    | 0.236 | 3.643 | 19              | 48    | 1.35E-04 | 2.85E-03 |
| KEGG_ASTHMA                                       | 0.919    | 0.275 | 3.340 | 14              | 30    | 4.19E-04 | 7.75E-03 |
| KEGG_CELL_ADHESION_MOLECULES_CAMS                 | 0.523    | 0.159 | 3.293 | 44              | 133   | 4.96E-04 | 8.16E-03 |
| BIOCARTA_NKT_PATHWAY                              | 1.190    | 0.363 | 3.281 | 10              | 26    | 5.17E-04 | 1.40E-02 |

**Supplementary Table 8. Gene-set analysis of significant genes identified by MAGMA**

| GeneSet                                           | NGENES | BETA  | BETA_STD | SE    | P        | FDR      |
|---------------------------------------------------|--------|-------|----------|-------|----------|----------|
| KEGG_AUTOIMMUNE_THYROID_DISEASE                   | 48     | 1.457 | 0.075    | 0.178 | 1.53E-16 | 2.85E-14 |
| KEGG_ALLOGRAFT_REJECTION                          | 33     | 1.529 | 0.065    | 0.194 | 1.51E-15 | 1.40E-13 |
| KEGG_GRAFT_VERSUS_HOST_DISEASE                    | 34     | 1.271 | 0.055    | 0.192 | 2.07E-11 | 1.28E-09 |
| KEGG_TYPE_I_DIABETES_MELLITUS                     | 40     | 0.975 | 0.046    | 0.165 | 1.55E-09 | 7.23E-08 |
| BIOCARTA_TH1TH2_PATHWAY                           | 19     | 1.426 | 0.046    | 0.234 | 5.86E-10 | 1.71E-07 |
| KEGG_INTESTINAL_IMMUNE_NETWORK_FOR_IGA_PRODUCTION | 44     | 0.861 | 0.042    | 0.159 | 3.36E-08 | 1.25E-06 |
| KEGG_CELL_ADHESION_MOLECULES_CAMS                 | 123    | 0.474 | 0.039    | 0.092 | 1.22E-07 | 3.80E-06 |
| BIOCARTA_CTLA4_PATHWAY                            | 19     | 1.384 | 0.045    | 0.263 | 6.96E-08 | 1.02E-05 |
| REACTOME_INTERLEUKIN_2_FAMILY_SIGNALING           | 39     | 1.016 | 0.047    | 0.185 | 2.09E-08 | 3.37E-05 |
| KEGG_VIRAL_MYOCARDITIS                            | 65     | 0.564 | 0.034    | 0.128 | 5.55E-06 | 1.47E-04 |
| KEGG_CYTOKINE_CYTOKINE_RECEPTOR_INTERACTION       | 249    | 0.317 | 0.037    | 0.073 | 7.02E-06 | 1.63E-04 |
| REACTOME_INTERFERON_GAMMA_SIGNALING               | 86     | 0.566 | 0.039    | 0.112 | 2.27E-07 | 1.84E-04 |
| KEGG_SYSTEMIC_LUPUS_ERYTHEMATOSUS                 | 122    | 0.482 | 0.039    | 0.113 | 1.05E-05 | 2.17E-04 |
| KEGG_JAK_STAT_SIGNALING_PATHWAY                   | 147    | 0.384 | 0.034    | 0.091 | 1.17E-05 | 2.18E-04 |
| KEGG_LEISHMANIA_INFECTION                         | 65     | 0.499 | 0.030    | 0.124 | 3.08E-05 | 5.21E-04 |
| KEGG_NATURAL_KILLER_CELL_MEDIATED_CYTOTOXICITY    | 128    | 0.374 | 0.031    | 0.095 | 4.07E-05 | 6.30E-04 |
| KEGG_ANTIGEN_PROCESSING_AND_PRESENTATION          | 78     | 0.471 | 0.031    | 0.123 | 6.76E-05 | 9.67E-04 |
| KEGG_ASTHMA                                       | 26     | 0.702 | 0.027    | 0.185 | 7.32E-05 | 9.72E-04 |
| BIOCARTA_ASBCCELL_PATHWAY                         | 11     | 1.414 | 0.035    | 0.343 | 1.90E-05 | 1.39E-03 |
| KEGG_T_CELL_RECEPTOR_SIGNALING_PATHWAY            | 105    | 0.345 | 0.026    | 0.096 | 1.68E-04 | 2.08E-03 |
| REACTOME_CYTOKINE_SIGNALING_IN_IMMUNE_SYSTEM      | 679    | 0.172 | 0.033    | 0.039 | 5.77E-06 | 3.10E-03 |
| REACTOME_COSTIMULATION_BY_THE_CD28_FAMILY         | 65     | 0.551 | 0.033    | 0.129 | 9.89E-06 | 3.94E-03 |
| REACTOME_PD_1_SIGNALING                           | 20     | 1.006 | 0.033    | 0.238 | 1.22E-05 | 3.94E-03 |
| REACTOME_ADAPTIVE_IMMUNE_SYSTEM                   | 720    | 0.152 | 0.030    | 0.038 | 2.67E-05 | 7.18E-03 |



|                                                            |      |       |       |       |          |          |
|------------------------------------------------------------|------|-------|-------|-------|----------|----------|
| REACTOME_REGULATION_OF_IFNG_SIGNALING                      | 14   | 1.021 | 0.028 | 0.257 | 3.52E-05 | 8.11E-03 |
| REACTOME_INTERLEUKIN_2_SIGNALING                           | 11   | 1.369 | 0.034 | 0.351 | 4.72E-05 | 9.54E-03 |
| REACTOME_RAP1_SIGNALLING                                   | 16   | 1.039 | 0.031 | 0.270 | 6.05E-05 | 1.09E-02 |
| REACTOME_INTERLEUKIN_3_INTERLEUKIN_5_AND_GM-CSF_SIGNALING  | 44   | 0.622 | 0.031 | 0.165 | 8.25E-05 | 1.21E-02 |
| REACTOME_INTERFERON_SIGNALING                              | 194  | 0.272 | 0.028 | 0.073 | 9.40E-05 | 1.26E-02 |
| KEGG_LONG_TERM_POTENTIATION                                | 66   | 0.366 | 0.022 | 0.120 | 1.18E-03 | 1.37E-02 |
| BIOCARTA_IL2_PATHWAY                                       | 20   | 0.824 | 0.027 | 0.236 | 2.43E-04 | 1.42E-02 |
| BIOCARTA_IL2RB_PATHWAY                                     | 36   | 0.529 | 0.024 | 0.155 | 3.25E-04 | 1.58E-02 |
| BIOCARTA_MHC_PATHWAY                                       | 11   | 0.916 | 0.023 | 0.276 | 4.56E-04 | 1.67E-02 |
| BIOCARTA_FAS_PATHWAY                                       | 30   | 0.549 | 0.022 | 0.165 | 4.41E-04 | 1.67E-02 |
| BIOCARTA_BLYMPHOCYTE_PATHWAY                               | 11   | 0.969 | 0.024 | 0.299 | 5.84E-04 | 1.89E-02 |
| REACTOME_TERMINATION_OF_O_GLYCAN_BIOSYNTHESIS              | 23   | 0.739 | 0.026 | 0.206 | 1.67E-04 | 2.08E-02 |
| REACTOME_E3_UBIQUITIN_LIGASES_UBIQUITINATE_TARGET_PROTEINS | 57   | 0.482 | 0.027 | 0.139 | 2.62E-04 | 2.83E-02 |
| KEGG_VASCULAR_SMOOTH_MUSCLE_CONTRACTION                    | 112  | 0.261 | 0.020 | 0.094 | 2.84E-03 | 3.11E-02 |
| REACTOME_PROTEIN_UBIQUITINATION                            | 75   | 0.409 | 0.026 | 0.120 | 3.29E-04 | 3.11E-02 |
| REACTOME_INTERFERON_ALPHA_BETA_SIGNALING                   | 70   | 0.429 | 0.027 | 0.127 | 3.47E-04 | 3.11E-02 |
| REACTOME_INTERLEUKIN_RECEPTOR_SHC_SIGNALING                | 23   | 0.810 | 0.029 | 0.238 | 3.42E-04 | 3.11E-02 |
| REACTOME_SYNTHESIS_OF_IP2_IP_AND_INS_IN_THE_CYTOSOL        | 13   | 0.768 | 0.021 | 0.231 | 4.51E-04 | 3.64E-02 |
| REACTOME_FCERI_MEDIATED_CA_2_MOBILIZATION                  | 30   | 0.614 | 0.025 | 0.187 | 5.04E-04 | 3.88E-02 |
| REACTOME_INNATE_IMMUNE_SYSTEM                              | 1003 | 0.106 | 0.024 | 0.032 | 5.37E-04 | 3.94E-02 |
| REACTOME_SIGNALING_BY_INTERLEUKINS                         | 436  | 0.156 | 0.024 | 0.048 | 6.50E-04 | 4.57E-02 |
